1 *Classification:* Pathogens

2

3 **Dynamic rotation of the protruding domain enhances the**  
4 **infectivity of norovirus**

5

6 Chihong Song<sup>a\*</sup>, Reiko Takai-Todaka<sup>b\*</sup>, Motohiro Miki<sup>c</sup>, Kei Haga<sup>b</sup>, Akira Fujimoto<sup>b</sup>, Ryoka  
7 Ishiyama<sup>b</sup>, Kazuki Oikawa<sup>b</sup>, Masaru Yokoyama<sup>d</sup>, Naoyuki Miyazaki<sup>e,f</sup>, Kenji Iwasaki<sup>e,f</sup>,  
8 Kosuke Murakami<sup>d</sup>, Kazuhiko Katayama<sup>b,d\*\*</sup> & Kazuyoshi Murata<sup>a\*\*</sup>

9

10 <sup>a</sup>National Institute for Physiological Sciences, 38 Nishigonaka, Myodaiji, Okazaki, Aichi, 444-  
11 8585, Japan. <sup>b</sup>Kitasato Institute for Life Sciences, Kitasato University, 5-9-1 Shirokane,  
12 Minato-ku, 108-8641, Tokyo, Japan. <sup>c</sup>DENKA Co., Ltd., 3-5-1 Asahimachi, Machida, Tokyo,  
13 194-8560, Japan. <sup>d</sup>National Institute of Infectious Diseases, 4-7-1 Gakuen, Musashi Murayama,  
14 Tokyo, 208-0011, Japan. <sup>e</sup>Institute for Protein Research, Osaka University, 3-2 Yamadaoka,  
15 Suita, Osaka, 565-0871, Japan. <sup>f</sup>Life Science Center for Survival Dynamics, Tsukuba Advanced  
16 Research Alliance, University of Tsukuba, 1-1-1 Tennodai, Tsukuba, Ibaraki, 305-8577, Japan

17 \* These authors are equally contributed.

18

19

20 **\*\*Corresponding authors:**

21 Kazuyoshi Murata: National Institute for Physiological Sciences, 38 Nishigonaka Myodaiji,  
22 Okazaki, Aichi, 444-8585, Japan. Tel: +81-564-55-7872. E-mail: kazum@nips.ac.jp.

23 Kazuhiko Katayama: Kitasato Institute for Life Sciences, Kitasato University, 5-9-1 Shirokane,  
24 Minato-ku, 108-8641, Tokyo, Japan. Tel: +81-3-5791-6130. E-mail: katayama@lisci.kitasato-  
25 u.ac.jp

26

27 **Keywords:** murine norovirus, capsid structure, cryo-electron microscopy, atomic model,  
28 conformational change, viral infection, domain rotation, metal ions

29

30

## 1 **Abstract**

2 Norovirus is the major cause of epidemic nonbacterial gastroenteritis worldwide. Lack of  
3 structural information on infection and replication mechanisms hampers the development of  
4 effective vaccines and remedies. Here, using cryo-electron microscopy, we show that the capsid  
5 structure of murine noroviruses changes in response to aqueous conditions. By twisting the  
6 flexible hinge connecting two domains, the protruding (P) domain reversibly rises off the shell  
7 (S) domain in solutions of higher pH, but rests on the S domain in solutions of lower pH. Metal  
8 ions help to stabilize the latter conformation in this process. Furthermore, in the resting  
9 conformation, the cellular receptor CD300lf is readily accessible, and thus infection efficiency  
10 is significantly enhanced. Two P domain conformations were also found in the human norovirus  
11 GII.3 capsid. These results provide new insights into the infection mechanisms of the non-  
12 envelope viruses that function in dramatic environmental changes such as the digestive tract.

13

14

## 15 **Significance Statement**

16 The capsid structures of caliciviruses have been reported to be classified into two different types,  
17 according to species and genotype. One is the rising P domain type as shown in human  
18 norovirus GII.10 and rabbit hemorrhagic disease virus, where the P domain rises from the S  
19 domain surface. The other is the resting P domain type as shown in human norovirus GI.1,  
20 sapovirus and San Miguel sea lion virus, where the P domain rests upon the S domain. Here,  
21 we demonstrate that the P domain of the murine norovirus infectious particles changes  
22 reversibly between the rising and resting P domain types in response to aqueous conditions.  
23 Our findings provide new insights into the mechanisms of viral infection of caliciviruses.

24

## 1 **Introduction**

2

3 Human norovirus (HNV) is a major cause of epidemic nonbacterial gastroenteritis worldwide  
4 (1). HNV often causes severe sporadic infections, especially in nurseries and nursing homes.  
5 However, there are no efficient treatments or vaccines due to lack of a robust cultivation system  
6 for studying the virus (2). Murine norovirus (MNV), a species of norovirus affecting mice, was  
7 identified in 2003 (3). MNV propagates in cell lines (3, 4), shares genetic features with, and  
8 has biochemically similar properties to HNV (5). For these reasons, MNV has been widely used  
9 as a model for HNV infection.

10 Norovirus is a non-enveloped, positive-stranded RNA virus belonging to the *Caliciviridae*  
11 family (6). The common capsid structure of 180 copies of VP1 capsid protein with T=3  
12 icosahedral symmetry is shared in all caliciviruses and has been reported in HNV virus-like  
13 particles (VLPs) produced by a baculovirus expression system (7). To form this structure, VP1  
14 is placed in three quasi-equivalent positions of asymmetric units designated as A, B, and C  
15 monomers. VP1's A and B dimers (A/B dimers) are located around the icosahedral fivefold  
16 axes, and VP1's C and C dimers (C/C dimers) are on the icosahedral twofold axes (8). The VP1  
17 protein consists of a shell (S) and protruding (P) domain. The S domain, containing an eight-  
18 stranded  $\beta$  sandwich structure, forms a contiguous icosahedral backbone to protect the central  
19 viral genome and has high amino acid sequence homology within the *Caliciviridae* family (9).  
20 On the other hand, the P domain extended from the S domain via a flexible hinge loop further  
21 divided into a lower P1 subdomain and an upper P2 subdomain. With respect to the amino acid  
22 sequence, the P1 subdomain can be divided into two parts, the N-terminal P1 part (P1-1) and  
23 the C-terminal P1 part (P1-2), with the P2 subdomain interposed. The P2 subdomain is exposed  
24 on the top of the P domain and functions for virus attachment to cells (10).

25 The P domain in caliciviruses shows two conformations (11). The first, called here the rising  
26 conformation, is shown in MNV-1 (12), HNV GII.10 (13), and rabbit hemorrhagic disease virus  
27 (RHDV) (14, 15), where the P domain rises from the S domain surface, forming an outer shell.  
28 The second, called here the resting conformation, is shown in HNV GI.1 (7), sapovirus (9), San  
29 Miguel sea lion virus (SMSV) (16) and feline calicivirus (FCV) (17, 18), where the P domain  
30 rests upon the S domain. The potential for dynamic structural changes in capsids has been  
31 discussed for viral infection and replication, but no direct evidence has been found thus far (11).

1 Here, using cryo-electron microscopy (cryo-EM), we show that the P domain of MNV  
2 infectious particles reversibly rotates  $\sim 70^\circ$ , in response to aqueous conditions, taking two  
3 different conformations; the rising and resting P domain conformations. The P domain extends  
4 away from the S domain surface in solutions with higher pH, and rests on the S domain surface  
5 in solutions with lower pH. Metal ions help to stabilize the resting conformation in this process.  
6 Furthermore, significant differences were found in the two P domain conformations with  
7 respect to MNV infection of cultured cells. High-resolution cryo-EM structural analysis using  
8 MNV-VLP revealed the structural similarity between infectious particle and VLP in MNVs and  
9 elucidates the molecular mechanism of P domain rotation. Our findings provide new insights  
10 into the mechanisms of viral infection of the non-enveloped viruses.

## 11 12 13 **Results**

### 14 15 **Dynamic rotation of the protruding domain in MNV controls viral infection**

16 For our structural studies, infectious particles of MNV type 1 (MNV-1) were produced by a  
17 reverse genetics system (19), propagated in RAW264.7 cells, and stored in DMEM (Dulbecco's  
18 Modified Eagle Medium). Viral particles were subjected to analysis by single-particle cryo-EM  
19 using a 200kV transmission electron microscope (TEM), and a 3D model was reconstructed at  
20 5.3 Å resolution, in which the P domain was stabilized with an outer P2 subdomain-based  
21 interaction and rested on the S-domain (Fig. 1A and C and SI Appendix, Fig. S1A-D).

22 Our results differed from a previous report of the 8 Å cryo-EM structure of MNV-1  
23 suspended in PBS (14), in which the P domains rotated  $\sim 70^\circ$  clockwise were mutually stabilized  
24 by interactions based on the inner P1 subdomain, and extended away from the S domain (14).  
25 To investigate these structural inconsistencies, we suspended the infectious particles in various  
26 aqueous solutions and examined them by cryo-EM. We were able to reproduce the reported  
27 MNV-1 capsid structure at 7.3 Å resolution when the viral particles were suspended in a PBS(-)  
28 solution containing 20m M EDTA at pH 8.0 (PBS(-)-EDTA (pH 8.0)) (Fig. 1B and D, SI  
29 Appendix, Fig. S1E-H). We found that the previously reported structure (14) of MNV-1 appears  
30 when the pH was above pH 7 and metal ions were removed from solution by chelation with  
31 EDTA (SI Appendix, Fig. S1I). Furthermore, the dynamic rotation of the P domain of MNV-1  
32 infectious particles occurred reversibly in response to aqueous conditions.

1       Next, we sought to elucidate the physiological functions of the two P domain conformations  
2 in terms of infectivity of the viral particles. When MNV-1 infectious particles pretreated with  
3 PBS(-)-EDTA (pH 8) were infected to RAW264.7 cells cultured in DMEM (pH 7.2 -7.4) (see  
4 Materials and Methods), they showed significantly more propagation delay (~3 hours) than  
5 those pretreated with DMEM (Fig. 1E). To investigate the reason for the propagation delay, we  
6 first compared the virus attachment on the host cell surface at 30 minutes after infection using  
7 quantitative real-time RT-PCR (qRT-PCR). The binding of MNV-1 particles pretreated with  
8 PBS(-)-EDTA (pH 8) to RAW264.7 cells did not show a significant difference from those  
9 pretreated with DMEM (Left bars in SI Appendix, Fig. S2A). RAW264.7 cells are known to  
10 express several molecules involved in MNV adsorption (20). In contrast, the HEK293T cells  
11 in which CD300lf is genetically expressed (HEK293T/CD300lf) can adsorb MNV particles on  
12 the cell surface through direct interaction with the expressed CD300lf (21). Therefore, the  
13 HEK293T/CD300lf cells were also used to evaluate MNV adsorption depending on the two P  
14 domain conformations. On the HEK293T/CD300lf cells, MNV-1 particles pretreated with  
15 PBS(-)-EDTA (pH 8) significantly showed a reduction of the cell binding compared to the  
16 particles pretreated with DMEM (Right bars in SI Appendix, Fig. S2A). In addition, flow  
17 cytometry (fluorescence-activated cell sorting (FACS)) analysis demonstrated that MNV-1  
18 particles pretreated with PBS(-)-EDTA (pH 8) showed lower binding on the cells (Median=268  
19 CV=157) compared with the MNV-1 particles pretreated with DMEM (Median= 357, CV=275)  
20 when the virus particles mixed with the cells at MOI (Multiplicity of infection) = 10 (SI  
21 Appendix, Fig. S2B). Furthermore, we compared early genome replication in RAW264.7 cells  
22 from 30 minutes to 12 hours. The virus genome of MNV-1 pretreated with PBS(-)-EDTA (pH  
23 8) increased only 3.6 fold, while the virus genome of MNV-1 pretreated with DMEM increased  
24 26.4 fold (SI Appendix, Fig. S2C).

25       We also identified using cryo-EM that the rising P domain conformation gradually changed  
26 to the resting conformation in 2 to 8 hours, when MNV-1 particles pretreated with PBS (-)-  
27 EDTA (pH 8) were suspended in DMEM (pH 7.2 – 7.4) (SI Appendix, Fig. S3A). Interestingly,  
28 particles mixed with two conformations were also observed between 2 and 6 hours (SI  
29 Appendix, Fig. S3B). The mixed P domain structure within a single particle suggests that even  
30 if the conversion of individual P domains may be rapid, it would take more time to modify the  
31 overall conformation of the capsid, where the P domains interact and are connected together  
32 like a net. Consequently, the delay time of the virus propagation pretreated with PBS(-)-EDTA

1 (pH 8) possibly corresponds to the time of the overall P domain conformational change of the  
2 virus particles in the cell culture media. These results suggest that the rising conformation of  
3 the P domain prevents the initial viral binding to the host cell surface via CD300lf, and it takes  
4 time to retrieve infectivity by changing the rising conformation to the resting conformation in  
5 the whole capsid. Hence, MNV-1 can control viral infectivity by the dynamic rotation of the P  
6 domain.

7 The same dynamic rotation of the P domain was also observed with MNV type S7 (MNV-  
8 S7) (SI Appendix, Fig. S4 and S5). MNV-S7 is a norovirus isolated from mouse stools in Japan  
9 in 2007 (22) and shows similar pathogenicity to MNV-1. The amino acid sequence of MNV-  
10 S7 VP1 protein shows 97% homology with MNV-1, with the nonhomologous 18 amino acids  
11 concentrated in the P domain (SI Appendix, Fig. S6). Interestingly, in the case of MNV-S7,  
12 rotation and elevation of the P domain only occurred in the solution of PBS(-)-EDTA at pH 8  
13 or higher (SI Appendix, Fig. S4K), which is slightly higher than that of MNV-1 (pH 7 or higher  
14 (SI Appendix, Fig. S1I)). Viral propagation was also delayed for viruses pretreated with PBS(-)-  
15 EDTA (pH 8) solution compared to viruses pretreated with DMEM, but the difference was  
16 smaller than that of MNV-1 (Fig. 1E and SI Appendix, Fig. S4L). The results indicate that the  
17 MNV-S7 particles more readily convert conformation to the resting state than the MNV-1  
18 particles in the infection medium of DMEM (pH 7.2 – 7.4). However, the binding of MNV-S7  
19 particles pretreated with PBS(-)-EDTA (pH 8) to both RAW264.7 and HEK293T/CD300lf cells  
20 showed a significant difference from those pretreated with DMEM (SI Appendix, Fig. S5A).  
21 For early genome replication in RAW264.7 cells from 30 minutes to 12 hours, the virus genome  
22 of MNV-S7 pretreated with PBS(-)-EDTA (pH 8) increased only 7.4 fold, while the virus  
23 genome of MNV-S7 pretreated with DMEM increased 17.2 fold (SI Appendix, Fig. S5B). The  
24 binding mechanism of MNV-S7 to host cells may be slightly different from that of MNV-1.

25

## 26 **Capsid structure of MNV-S7 VLP**

27 To investigate the molecular mechanism of the dynamic rotation of the P domain in the MNV  
28 capsid, we determined the atomic structure of the entire MNV capsid by single-particle cryo-  
29 EM in a 300kV TEM. VLPs of MNVs were used for this structural analysis. The higher  
30 resolution capsid models are easier to obtain from VLPs than infectious particles containing  
31 nucleotides (23), and VLPs satisfy the biosafety level requirements of the 300kV EM room.  
32 VLPs of MNV-1 and MNV-S7 were prepared using a modified baculovirus expression system

1 (24, 25) and stored in DMEM. As a result, VLPs of MNV-1 formed multiple types of  
2 icosahedral particles of 40–50 nm, whereas those of MNV-S7 formed a uniform icosahedral  
3 particle in the size of about 40 nm. Therefore, VLPs of MNV-S7 were used for the high  
4 resolution cryo-EM analysis, and the 3D model was determined at 3.5 Å resolution (Fig. 2 and  
5 SI Appendix, Fig. S7). Local resolutions were in the range of 3.3 to 3.7 Å in the capsid (Fig.  
6 2B). The highest resolution of 3.3 Å was observed in the S domain, and lower resolutions were  
7 mainly located in the peripheral regions of the P domain.

8 Atomic models of the MNV-S7 VLP capsid were built for the quasi-equivalent A, B, and  
9 C monomers of VP1, respectively (SI Appendix, Fig. S6 and Table S2). The complete C $\alpha$   
10 backbone structure of the MNV-S7 VLP is shown in Fig. 2C. Other features of the models (e.g.,  
11 S and P domains, C $\alpha$  backbone of the VP1 C monomer) are presented in Fig. 2D-F. For  
12 modeling VP1's A and B monomers, 513 amino acids from Gln19 to Gly531 and 516 amino  
13 acids from Ala16 to Gly531 were used, respectively (SI Appendix, Fig. S6). For modeling  
14 VP1's C monomers, 502 amino acids from Val30 to Gly531 were used (SI Appendix, Fig. S6).  
15 The models were also fitted to the 5.2 and 5.3 Å resolution cryo-EM maps of the MNV-S7 and  
16 MNV-1 infectious particles with high cross-correlation coefficients of 0.92 and 0.91 (see  
17 Materials and Methods), respectively, indicating that the structure of MNV-S7 VLP is highly  
18 similar to both MNV-S7 and MNV-1 infectious particles.

19 A comparison of the atomic model of the MNV-S7 VLP with the reported crystallographic  
20 models of the MNV-1 P domain (PDB ID: 3LQ6 and 3LQE) showed a high degree of structural  
21 similarity, except for two flexible loops. The  $\beta$ C''– $\beta$ D'' loop (SI Appendix, Fig. S6) extends  
22 outward and forms a part of the horn-like structure (22) (arrow in Fig. 2B) on the top of the P  
23 domain in our cryo-EM model (single asterisk in Fig. 2E), whereas the crystallographic models  
24 of MNV-1 extends horizontally with respect to the capsid surface (26). Another loop located  
25 on the opposite side of the  $\beta$ C''– $\beta$ D'' loop conversely extends horizontally with respect to the  
26 capsid surface in our cryo-EM model (double asterisk in Fig. 2E), whereas that of the  
27 crystallographic model extends outward (26). These two loops were disordered in the recent  
28 reported crystallographic model of the MNV-1 P domain dimer containing the soluble domain  
29 of the cellular receptor, CD300lf (PDB ID: 5OR7) (27). In our cryo-EM model, these loops  
30 interact with each other in the VP1 dimer and function to stabilize the P domain dimers in the  
31 viral capsid.

32

## 1 **Molecular interactions between VP1 proteins**

2 To understand the capsid structure of the resting P domain conformation, showing higher levels  
3 of infectivity, the molecular interactions between the P domain dimers of the MNV-S7 VLP  
4 suspended in DMEM were investigated. The cryo-EM map of the MNV-S7 VLP in DMEM  
5 revealed several hydrophobic and charged interactions between the neighboring A/B and C/C  
6 dimers at the P2 level (yellow in Fig. 3). We propose the following chemical interactions  
7 between residues on the P domain surface: Asn409, Gly411, Leu412, and Pro415 located on  
8 the  $\beta F''$ - $\beta B'$  loop (SI Appendix, Fig. S6) of the C/C dimer interact with Gln371, Arg373, Val368,  
9 and Pro319 located on the  $\beta B''$ - $\beta C''$  and  $\beta D''$ - $\beta E''$  loops (SI Appendix, Fig. S6) of the A/B  
10 dimers, respectively (Fig. 3B and C).

11 As expected from sequence homology (SI Appendix, Fig. S6), the structure of the S domain  
12 of MNVs was similar to the HNV GI.1 VLP (PDB ID: 1IHM) (7) except for some local  
13 distortions (SI Appendix, Fig. S8G and H). Our cryo-EM structural study showed several  
14 elaborate crosslinks between adjacent N-terminals of the S domains, by successfully modeling  
15 the residues from Gln19 in the A monomer, Ala16 in the B monomer, and Val30 in the C  
16 monomer (SI Appendix, Fig. S8A). The flexible N-terminals formed various interactions with  
17 each other between adjacent S domains at the twofold, threefold, pseudo-threefold, and fivefold  
18 axes (SI Appendix, Fig. S8B-F). The basic architecture is similar to the previous reports of  
19 other members of the *Caliciviridae* family, however, the fine structure is so far unique. As  
20 shown in SI Appendix, Fig S8G and H, the currently reported N-terminal arms (NTAs) are  
21 structurally divided into two groups. One group shown in HNV GI.1 (7) and RHDV (15) is that  
22 the NTAs run along the outer bottom edge of their own S domain and interact with the  
23 neighboring S domain (Blue, and cyan in SI Appendix, Fig. S8G and H). The other group shown  
24 in SMSV (16) and FCV (17) is that the NTAs run along the outer bottom edge of their  
25 neighboring S domain and interact with them (Yellow and green in SI Appendix, Fig. S8G and  
26 H). The NTA in MNV has the similar conformation with the first group (Red in SI Appendix,  
27 Fig. S8G and H). Consequently, the rigid capsid shell of MNV was maintained by these outer  
28 P domain interactions and inner S domain crosslinks.

29

## 30 **Molecular mechanism of the reversible rotation of the P domain dimers**

31 We investigated the capsid structure of MNV in the rising P domain conformation to understand  
32 the molecular mechanism of the dynamic rotation of the P domain. The atomic model of the



1 MNV-S7 VLP in DMEM was modified and fitted into the 7.2 Å cryo-EM map of the MNV-S7  
2 infectious particle suspended in PBS(-)-EDTA (pH 8) with the high cross-correlation  
3 coefficient of 0.92 (SI Appendix, Fig. S4I) (see Materials and Methods) and the atomic model  
4 of the rising P domain conformation was estimated (SI Appendix, Fig. S9). The new model in  
5 PBS(-)-EDTA (pH 8) showed that the P domain rotates clockwise by  $\sim 70^\circ$  and rises up from  
6 the S domain surface by  $\sim 13$  Å compared to the original model in DMEM (Fig. 4A-D). The  
7 cryo-EM map of the rising P domain conformation suggested that new interactions link the P1  
8 subdomain of the C/C dimer to the adjacent P1 subdomain of the A/B dimers via hydrophobic  
9 and charged interactions. These are formed between residues on the newly facing P domain  
10 surface; i.e., Pro425, Ser504, Leu524, and Gln526 in the  $\beta F''$ - $\beta B'$  and  $\beta F'$ - $\alpha G$  loops, while the  
11 C-terminal (SI Appendix, Fig. S6) of the P1 subdomain in the C/C dimer interact with Phe423,  
12 Gln263, Leu524, and Arg523 located in the same loops and C-terminal in the A/B dimer,  
13 respectively (SI Appendix, Fig. S9B and C).

14 An animated comparison of the P domain conformations and reversible structural dynamics  
15 of the MNV capsid under different aqueous conditions is shown in Movie S1. The P domains  
16 in DMEM rested on the S domains and were stabilized by interaction between the adjacent P  
17 domains at the P2 level (Fig. 4A and C), while the P domains in PBS(-)-EDTA (pH 8) rose up  
18 from the S domain and were stabilized by interaction between the adjacent P domains at the P1  
19 level (Fig. 4B and D). The flexibility of the hinge connecting the P and S domains (SI Appendix,  
20 Fig. S10A) is important for dynamic twisting of the P domain, which moves the P domain up  
21 and down by  $\sim 13$  Å. In addition, as the P domain rose, the A/B dimer was bent slightly toward  
22 the fivefold axis (SI Appendix, Fig. S11).

23 We also observed two conformations of the P domain in the same HNV GII.3 (TCH04-577  
24 strain) VLPs by cryo-EM (Fig. 5). Single particle analysis showed that the two P domain  
25 conformations were similar to the resting and rising P domain conformations of MNVs (Fig. 5,  
26 SI Appendix, Fig. S12). In the T=3 icosahedral particles of the HNV GII.3 VLP suspended in  
27 DMEM, 16% of the total showed the rising P domain conformation, and the rest showed the  
28 resting P domain conformation. The ratio did not change even in PBS(-)-EDTA (pH 8.0). Our  
29 observations suggest that the capsid of HNV can also assume two reversible P-domain  
30 conformations, though dynamic rotation is currently identified only in MNV infectious particles.  
31 Further investigations are needed to determine the factors that control the orientation of the P  
32 domain in HNV.

1

2

### 3 **Discussion**

4 Here, we reported that reversible dynamic rotation of the P domain results in two  
5 conformations of the MNV capsid. The main trigger for the conformational change was the pH  
6 of the solution: a higher pH changed the conformation of the P domain to the rising state, while  
7 a lower pH changed it to the resting state. Interestingly, the pH thresholds differed by genotype:  
8 MNV-1 showed ~pH 7 (SI Appendix, Fig. S1I) and MNV-S7 showed ~pH 8 (SI Appendix, Fig.  
9 S4K). However, it was not clear what determines the threshold for interconversion. Some  
10 different amino acids between the P and S domains may perform it by changing surface charge,  
11 while metal ions binding to the region between the P and S domains, may help to stabilize the  
12 resting conformation (SI Appendix, Fig. S10). Thus, in addition to higher pH, EDTA is  
13 necessary to remove metal ions from solution, permitting the conversion of the capsid protein  
14 to the rising state. As evidence, we identified density between the two carboxylates (Glu223  
15 and Asp231) in the flexible hinge of the resting P domain conformation, where a metal ion is  
16 expected to bind to these residues (SI Appendix, Fig. S10B and C). This suggests that the  
17 flexible hinge between the P and S domains could be folded by binding metal ions in DMEM  
18 and unfolded by releasing the metal ion in PBS(-)-EDTA (pH 8). In addition, several potential  
19 interaction sites connecting the S and P domains are identified in the resting state map (e.g.  
20 Glu66 in S domain - Ser519 in P domain, Glu176 in S domain - Tyr227 in P domain, Asp174  
21 in S domain - Gln469 in P domain). These residues may also function to stabilize the resting  
22 conformation via metal ions in DMEM. The localization of all metal ions which directly couple  
23 the P and S domains will be identified by future higher resolution work.

24 Our infection and adhesion experiments of the virus particles to the host cells clearly  
25 suggested that the viruses in the resting P domain conformation can attach to and infect the host  
26 cells, but the viruses in the rising P domain conformation cannot. Further, we performed cryo-  
27 EM single particle analysis of MNV-S7 VLP incubated with recombinant CD300lf (rCD300lf)  
28 molecules, which is the soluble domain of a cellular receptor of MNV discovered recently (21,  
29 28). The VLPs were treated in DMEM or PBS(-)-EDTA (pH 8) to induce the resting or rising  
30 P domain conformation before incubation with rCD300lf. The cryo-EM map of the MNV-S7  
31 VLP pretreated in DMEM showed a weak density on the side of the A/B dimer and extending  
32 towards the center of the threefold axis in the icosahedral capsid, while the map of the MNV-

1 S7 VLP pretreated in PBS(-)-EDTA (pH8) was not. Because of the weak density where  
2 rCD300lf did not appear to bind to all P-domains of the icosahedral particles, the map was  
3 further processed with the “particle symmetry expansion” technique (see Materials and  
4 Methods). The individual P-domain dimers on the capsid were classified in 3D, and the only  
5 3D class with the density assumed to be bound by rCD300lf (5.6% of the total) was selected  
6 (SI Appendix, Fig. S13A). The selected P-domain dimers were then used for 3D refinement by  
7 imposing C1 symmetry. As a result, the extra density on the P domain dimer became clearer,  
8 though the overall density of rCD300lf has not yet been acquired (SI Appendix, Fig. S13B-C).

9 In order to investigate the binding mode of rCD300lf to the P domain, a protein-protein  
10 docking simulation was performed using the MOE program (see Materials and Methods) (SI  
11 Appendix, Fig. S13D-E). In the docking simulation, and based on the extra density that  
12 appeared upon addition of rCD300lf (purple in SI Appendix, Fig. S13C), Ser43 and Lys45 in  
13 the C-C' loop of rCD300lf interacted with Gly400 in the  $\beta$ F''- $\beta$ B' loop and Ala446 in the  $\beta$ B'-  
14  $\beta$ C'' loop (SI Appendix, Fig. S6) of the MNV-S7 P domain, respectively, through hydrogen  
15 bonding (SI Appendix, Fig. S13E-F). The adaptation of our rCD300lf binding model in our  
16 cryo-EM map showed that the accessibility of CD300lf to the P domain is altered in the resting  
17 and rising P domain conformations. The approach of rCD300lf to the P domain is readily  
18 accessible in the resting P domain conformation (SI Appendix, Fig. S13G), whereas it is  
19 spatially restricted in the rising P domain conformation (SI Appendix, Fig. S13H and Movie  
20 S2). Although this poor accessibility is unlikely to be a direct cause of non-infectivity of the  
21 rising P domain conformation, it showed a possibility that the rotation of the P domain  
22 modulates viral infectivity by altering the accessibility of the viral epitopes to cellular receptors.

23 The binding mode of rCD300lf on the P domain were slightly different from the results of  
24 the recent X-ray crystallography using the co-crystal (PDB ID: 5OR7, 6C6Q) (27, 29) (SI  
25 Appendix, Fig. S13J). In the model, the actual binding site was close, but rCD300lf itself  
26 approached from a higher position with a rotation of  $\sim 90^\circ$ . The rCD300lf engaged a cleft  
27 between the A-B and D-E loops of the P2 subdomain in the crystal model (29), while the  
28 position in our model is slightly below the two loops. This difference was likely due to the  
29 different binding methods or the limited resolution of our cryo-EM map. However, although  
30 the binding mode is different, the spatial restriction of the CD300lf accessibility depending on  
31 the dynamic P domain rotation can be applied to the co-crystal model.

1 The resting P domain conformation showed higher accessibility of the cellular receptor  
2 CD300lf than the rising P domain conformation, causing greater viral infectivity. These  
3 observations raise a question: why does norovirus require such a reversible rising P domain  
4 conformation? One possibility is that the conformational changes are important during virus  
5 assembly and disassembly in host cells. Tobacco mosaic virus (TMV), well-studied for its  
6 structural and physiological characteristics, forms a metastable structure in the cell, where  
7 lower concentration of metal ions and higher pH are proposed as the trigger for virus  
8 disassembly (30). A recent cryo-EM study showed the calcium ion-dependent conformational  
9 changes of TMV, indicating that chemical bonds involving calcium ions prevents disassembly  
10 of TMV (31). Dengue and Zika viruses also show pH-dependent structural changes associated  
11 with viral replication (32, 33). In this study, we observed several amino acid interactions  
12 between the P and S domains in the resting P domain conformation, while the P domain only  
13 connected *via* the extended flexible hinge in the rising P domain conformation. In addition,  
14 MNVs having a rising P domain showed a resolution about 2 Å lower (7.2 Å) than MNVs  
15 having a resting P domain (5.2 Å) (SI Appendix, Fig. S1D and H, SI Appendix, Fig. S4F and  
16 J). These facts suggest that MNVs with a rising P domain are relatively flexible. Such structural  
17 flexibility may facilitate viral assembly and disassembly. HNV GII.3 VLPs also showed that  
18 the rising P domain conformation easily collapsed due to surface tension of thin vitreous ice,  
19 thus leaving most of the particles with a resting P domain conformation in the thin ice of cryo-  
20 EM (SI Appendix, Fig. S14). These results suggest that the rising P domain conformation may  
21 represent an intermediate state of the viral assembly and disassembly in the host cells. Upon  
22 entering into the host cell, norovirus changes its structure to the metastable form to release the  
23 viral genome into cytosol at relatively lower metal ion concentration and higher pH conditions.  
24 Conversely, norovirus assembled in the host cell undergoes a conformational change to the  
25 stable form in a less amenable extracellular environment, such as the digestive tract, which is  
26 rich in free metal ions and with dramatically lower pH.

27 Recently, a dynamic feature of calicivirus capsid was reported in FCV. There, VP2, a minor  
28 capsid protein, forms a portal-like assembly on the capsid surface after receptor engagement,  
29 suggesting that it functions as a channel for delivery of the viral genome (18). In contrast to  
30 MNV, FCV requires a low pH for release of viral RNA from the capsid (34). It is unknown  
31 whether MNV has a similar portal structure consisting of VP2, but a rearrangement of the

1 capsid structure, such as the dynamic rotation of the P domain, is believed to be a necessary  
2 step to form the portal and release the viral genome.

3 The interaction between P domain dimers has also been observed in human norovirus,  
4 where it is more complicated. The HNV GI.1 VLP shows dimer-dimer interactions at the P2  
5 subdomain level, where the P2 subdomain of the C/C dimer links with four adjacent A/B dimers  
6 and the P domains rest on the S domains (7). By contrast, in HNV GII.10 VLP the similar  
7 dimer-dimer interactions are carried out at the P1 subdomain level because of the relatively  
8 small P2 subdomains, and the P domain rises from the S domain by  $\sim 16$  Å, like the rising P  
9 domain conformation in MNV. These different conformations of the P domains in different  
10 strains of HNV are only derived from the interaction sites at the P1 or P2 levels that can be  
11 structurally achieved by a simple rotation of the P domain. In addition, we previously reported  
12 a unique monoclonal antibody against the HNV GII.10 VLP, which binds to the occluded site  
13 between the P and S domains of the viral capsid and impairs binding to the histo-blood group  
14 antigens (13). This suggests that the antibody inhibits viral-cell attachment or/and infection by  
15 interfering with the rotation of the P domain from the rising position to the resting position.  
16 Currently, dynamic rotation of the P domain has been identified only in the infectious particles  
17 of MNV. If we are able to obtain infectious particles of HNV, we might be able to observe a  
18 similar phenomenon in human norovirus in the future.

19

20

## 21 **Materials and Methods**

22

### 23 **Sample preparations of norovirus infectious particles and VLPs**

24 Infectious particles of MNV-1 were produced using plasmid-based reverse genetics as  
25 previously described (21). Those of MNV-S7 were produced in the same procedure as MNV-  
26 1. pMuNoV-MNV-1 was constructed by exchanging the MNV sequence portion from MNV-1  
27 to MNV-S7 with the In-Fusion cloning system (Takara Bio Inc.), according to the  
28 manufacturer's protocol. MNV-1 infectious cDNA was kindly provided by I. Goodfellow as an  
29 MNV-1 cDNA plasmid (35). Infectious viruses of MNV-1 and MNV-S7 were propagated with  
30 RAW264.7 cells (American Type Culture Collection). The culture supernatant was collected  
31 two days after infection. MNV was precipitated using ultracentrifugation with a 30% sucrose  
32 cushion and purified with cesium chloride (CsCl) equilibrium ultracentrifugation. MNV was

1 diluted with DMEM without any additional supplements and precipitated again to remove CsCl.  
2 The purified MNV pellet was resuspend in DMEM (Nacalai Tesque Inc.) or phosphate-buffered  
3 saline without calcium and magnesium containing 20mM EDTA at pH 8.0 (PBS(-)-EDTA (pH  
4 8.0)) to prepare  $10^7$  infectious virions / $\mu$ L. VLPs of MNV-1, MNV-S7, and HNV GII.3 TCH04-  
5 577 strains were produced by a baculovirus expression system (24, 25) and purified with CsCl  
6 equilibrium ultracentrifugation in the same procedure as infectious particles.

7

### 8 **Analysis of MNV one-step propagation curve**

9 RAW264.7 cells were cultured at a density of  $10^6$  cells/well in 48-well plates and infected with  
10 the purified infectious particles of MNV-1 or MNV-S7 at a MOI = 2 or more. After 30 min of  
11 incubation at 37°C, the inoculum was removed, and the cells were washed three times with  
12 DMEM to remove unbound viruses, and DMEM containing 10% FBS (Thermo Fisher  
13 Scientific) was added. The plates were incubated at 37°C for the stated time; time zero indicates  
14 the time at which the medium was added. After 0, 3, 6, 9, 12, 15, 18 and 24 h of incubation, 20  
15  $\mu$ L of the culture medium was sampled and centrifuged at 10,000 g for 10 min at 4°C to remove  
16 cells and cell debris. 15  $\mu$ L of supernatant was collected and stored at -80°C until RNA  
17 extraction. 10  $\mu$ L of the supernatant was used for RNA extraction and qRT-PCR, according to  
18 published protocols (36). These assays were performed three times independently and  
19 calculated standard deviations (SD) plotted at each point.

20

### 21 **Evaluation of MNV-1 Binding using FACS**

22 MNV-1 binding to the host cells was examined by FACS (fluorescence activated cell sorter)  
23 analysis. Briefly,  $1 \times 10^6$  of HEK293T/CD300lf cells were incubated with purified infectious  
24 MNV-1 particles ( $1 \times 10^9$  CCID<sub>50</sub>), that were suspended in DMEM-10% FBS or PBS (-)-20mM  
25 EDTA (pH 8), for 30 min at 4°C. After washing, the cells were incubated with anti- MNV VP1  
26 rabbit polyclonal antibody labeled by Dylight 488 (LNK221D488, BioRad) for 30 min at 4°C.  
27 The solution in each step includes 3% FCS and 20 mM NaN<sub>3</sub> to prevent the cells from virus  
28 uptake. Afterward, the cells were washed again and analyzed by BD FACSMelody (BD  
29 Bioscience) and analyzed by using FlowJo software.

30

### 31 **Evaluation of cell binding and early genome replication of MNV in the host cells using** 32 **qRT-PCR**

1 RAW264.7 or HEK293T/CD300lf cells were cultured at a density of  $10^5$  cells/well in 96-well  
2 plates and infected with the purified infectious particles of MNV-1 or MNV-S7 at a  $MOI \leq$   
3 10. After 30 min of incubation at  $37^\circ\text{C}$ , the cells were washed twice with DMEM to remove  
4 unbound viruses. The total RNA was extracted by NucleoSpin RNA (Takara Bio Inc.) and the  
5 virus particles attached on the cell surface were estimated by qRT-PCR, according to published  
6 protocols (36). The early genome replication in each cell incubated for 0, 2, 4, 6, 8, 10, and 12  
7 hours post-infection. These assays were performed three times independently and calculated  
8 standard deviations (SD) values and plotted at each point.

9

### 10 **Cryo-EM and image processing**

11 Aliquots (2.5  $\mu\text{L}$ ) of the purified MNV infectious particles and HNV GII.3 VLP were placed  
12 onto R 1.2/1.3 Quantifoil grids (Quantifoil Micro Tools) coated with a thin carbon membrane  
13 that were glow-discharged using a plasma ion bombarder (PIB-10, Vacuum Device Inc.)  
14 immediately beforehand. These grids were then blotted and plunge-frozen using a Vitrobot  
15 Mark IV (FEI Company) with the setting of 95% humidity and  $4^\circ\text{C}$ . Vitreous ice sample grids  
16 were maintained at liquid-nitrogen temperature within a JEM2200FS electron microscope  
17 (JEOL Inc.), using a side-entry Gatan 626 cryo-specimen holder (Gatan Inc.), and were imaged  
18 using a field-emission gun operated at 200 kV and an in-column (Omega-type) energy filter  
19 operating in zero-energy-loss mode with a slit width of 20 eV. Images of the frozen hydrated  
20 norovirus particles were recorded on a direct-detector CMOS camera (DE20, Direct Electron,  
21 LP) at a nominal magnification of  $40,000\times$ , corresponding to  $1.422\text{\AA}$  per pixel on the specimen.  
22 Using a low-dose method, the total electron dose for the specimen is about 20 electrons per  $\text{\AA}^2$   
23 for a 3-second exposure. Individual images were subjected to per-frame drift correction by a  
24 manufacturer provided script.

25 For MNV-1 infectious particles suspended in DMEM and PBS(-)-EDTA (pH 8.0), 6,708  
26 and 4,704 particles were selected from 1,046 and 2,188 images, respectively, and then extracted  
27 using RELION 2.0 (37) after determining the contrast transfer function (CTF) with CTFFIND4  
28 (38). Alignment and classification of extracted particles were performed, and a 3D map was  
29 reconstructed in RELION 2.0 by using an initial model that generated with icosahedral  
30 symmetry by EMAN1 (39). The 3D reconstructions were computed, and the final resolutions  
31 of the density maps were estimated to be resolutions of 5.3 and  $7.3\text{\AA}$ , respectively, using a gold  
32 standard Fourier shell correlation (cutoff 0.143) between two different independently generated

1 reconstructions (40). 3D renders of the maps were created in UCSF Chimera (41). For MNV-  
2 S7 infectious particles suspended in DMEM and PBS(-)-EDTA (pH 8.0), 2,049 and 2,739  
3 images were collected, respectively, and the 3D reconstructions were calculated with 17,820  
4 and 5,063 particles at 5.2 and 7.2 Å resolution, respectively. For HNV GIL3 VLP containing  
5 the resting P domain and the rising P domain, 106 and 1,917 images were collected, and 3D  
6 reconstructions were calculated with 279 and 1,482 particles at 9.3 and 12.9 Å resolution,  
7 respectively. Data collection and image processing are summarized in Table S1.

8 For high-resolution structural analysis, cryo-EM images for MNV-S7 VLP were acquired  
9 with a Falcon II detector at a nominal magnification of 75,000, corresponding to 0.86 Å per  
10 pixel on a Titan Krios at 300 kV (Thermo Fisher Scientific). A low-dose method (exposures at  
11 5 electrons per Å<sup>2</sup> per second) was used, and the total number of electrons accumulated on the  
12 sample was ~40 electrons per Å<sup>2</sup> for an 8 second exposure. A GIF-quantum energy filter (Gatan  
13 Inc.) was used with a slit width of 20 eV to remove inelastically scattered electrons. Individual  
14 micrograph movies were subjected to per-frame drift correction by MotionCor2 (42). Particles  
15 were selected from the 2,746 images and the final 3D reconstruction was computed with 41,847  
16 particles. The resolution of the density map was estimated to be 3.5 Å using the “gold standard”  
17 FSC criterion. Data collection and image processing are summarized in Table S2.

18

### 19 **Atomic model building of MNV-S7 VP1**

20 The P domain atomic model of MNV-1 (PDB ID: 3LQE) and the S-domain atomic model of  
21 HNV (PDB ID: 1IHM) were used as templates for the homology model building of the P and  
22 S domains of the MNV-S7 VP1, respectively. Multiple-sequence alignments of VP1s of MNV-  
23 S7, MNV-1 and HNV were performed using the PROMALS3D program (43). The sequence  
24 alignments of the P and S domains were used as the input of MODELLER software (44) to  
25 generate the comparative models. The maps containing A, B, and C monomers were extracted  
26 using UCSF Chimera (41), respectively, for VP1s of MNV-S7 and MNV-1. The models were  
27 manually re-built in the individual maps from the homology model mentioned above using  
28 COOT (45) and refined using PHENIX (46). The models fitted to the cryo-EM maps were  
29 evaluated with the cross-correlation coefficient between the model and the cryo-EM map  
30 respectively, using “Fit in Map” of UCSF Chimera (41). Data collection, image processing, and  
31 model statistics are summarized in Table S2.

32



## 1 **Binding experiment of CD300lf to MNV-S7 VLP**

2 Recombinant CD300lf (rCD300lf) (47) was kindly provided by S.Y. Park and prepared as  
3 reported (21). MNV-S7 VLP was incubated with rCD300lf for 1 h at room temperature, and  
4 then applied to a Quantifoil grid and plunge-frozen. Image data were collected and processed  
5 by the same procedure as the MNV virions. The final 3D map was reconstructed at 4.75Å  
6 resolution (gold standard FSC criterion) with 26,124 particles by imposing icosahedral (I1)  
7 symmetry. Then, the densities containing the periphery of the P2 subdomains of A/B and C/C  
8 dimers were extracted using UCSF Chimera (41), respectively. The extracted densities were  
9 used to generate masks around the P2 subdomains of A/B and C/C dimers using “Mask creation”  
10 command in RELION. Using the “relion\_particle\_symmetry\_expand” command (37), the  
11 matrixes for each of the 60 subunits in each particle image were computed. The process  
12 generated  $60 \times 26,124$  (1,567,440) sub-particle images. These sub-particles were subjected to  
13 “3D focused classification” with the masks around the P2 subdomains of A/B dimer or C/C  
14 dimer, while keeping the orientations of each image used for the refinement of the 4.75-Å map.  
15 Among the six classes, one class (5.6% of the total) was selected that contained the density  
16 assumed to be bound CD300lf (SI Appendix, Fig. S13A). The particle images with the selected  
17 subunit were used for 3D refinement with a mask of the whole virus particle by imposing C1  
18 symmetry. The map with the density of the CD300lf was reconstructed at 6.5Å resolution (gold  
19 standard FSC criterion) for total particle, and the resolution for only the focused area was  
20 estimated to be about 12Å (SI Appendix, Fig. S13B).

21

## 22 ***In silico* docking model of CD300lf to MNV-S7 capsid**

23 The docking model of the CD300lf extracellular domain for the P domain dimer of MNV-S7  
24 was constructed using Dock application of MOE 2015.10 (Chemical Computing Group). For  
25 the model of CD300lf, the crystal structure of the mouse CD300lf extracellular domain at a  
26 resolution of 2.1 Å (PDB ID: 1ZOX) was used. The program finally generated three potential  
27 docking models between the P domain and CD300lf, representing the docking scores based on  
28 generalized born solvation model of -52.39, -50.62, -50.61 kcal/mol, respectively. The model  
29 with the best score and physically acceptable poses was selected (SI Appendix, Fig. S13D-F).

30

## 31 **Data Availability**

1 The data supporting the findings of this study is deposited to EMDB and PDB as  
2 described in Data Deposition section and can be obtained upon reasonable  
3 request from the corresponding authors.

4

## 5 **Acknowledgements**

6 We thank T.J. Smith for providing the 8 Å cryo-EM map of MNV-1, T. Sato for helping the  
7 initial model building of the MNV-S7, K. Namba and Y. Kawaoka for their helpful discussions,  
8 and G.C. Howard and R.N. Burton-Smith for critical reading of the manuscript. We also thank  
9 S.Y. Park and M. Ohki for kindly giving us the recombinant CD300lf. This work was supported  
10 by AMED (to K.K.; Grant No. JP18fk0108034h and JP18am0101072j to Ka.M.), MEXT  
11 KAKENHI (Grant No. JP26102545 and JP16H00786 to Ka.M.), JSPS KAKENHI (to K.K.),  
12 and the collaborative programs for National Institute for Physiological Sciences (to K.K.).

13

## 14 **Footnotes**

15 **Author Contributions:** R.T., M.M., K.H., A.F., Ko.M., R.I., K.O., and K.K. prepared viral  
16 particles and performed cell adhesion experiments. C.S. and Ka.M. prepared cryo-EM  
17 specimens, performed 200 kV cryo-EM and image analysis, and built the atomic models. N.M.  
18 and K.I. collected and pre-processed data with the 300-kV microscope. M.Y. performed the  
19 docking simulation analysis. Ka.M. and K.K. supervised the work and coordinated experiments.  
20 C.S. and Ka.M. initially wrote the manuscript and prepared the figures with input from the other  
21 authors. All authors contributed to the finalization of the manuscript.

22

23 **Competing interests:** The authors declare that they have no conflict of interest.

24

25 **Data deposition:** Cryo-EM maps have been deposited in the Electron Microscopy Data Bank  
26 under accession numbers EMD-9735, EMD-9736, EMD-9737, EMD-9738, EMD-9739, EMD-  
27 9740 and EMD-9741. The atomic models have been deposited in the Protein Data Bank under  
28 accession number 6IUK.

29

30

## 31 **References**

- 1 1. H. L. Koo, N. Ajami, R. L. Atmar, H. L. DuPont, Noroviruses: The leading cause of  
2 gastroenteritis worldwide. *Discov. Med.* 10, 61–70 (2010).
- 3 2. K. Ettayebi *et al.*, Replication of human noroviruses in stem cell–derived human enteroids.  
4 *Science* 353, 1387–1393 (2016).
- 5 3. M. Karst, C. E. Wobus, M. Lay, J. Davidson, W. Herbert, Virgin IV, STAT1-Dependent  
6 Innate Immunity to a Norwalk-Like. *Science* 299, 1575–1578 (2003).
- 7 4. C. E. Wobus *et al.*, Replication of Norovirus in cell culture reveals a tropism for dendritic  
8 cells and macrophages. *PLoS Biol.* 2, e432 (2004).
- 9 5. C. E. Wobus, L. B. Thackray, H. W. Virgin, Murine norovirus: a model system to study  
10 norovirus biology and pathogenesis. *J. Virol.* 80, 5104–5112 (2006).
- 11 6. K. Y. Green, Caliciviridae: the Norovirus. In *Fields Virology* 6th. ed. (eds Knipe D. M. *et*  
12 *al.*) 2, 582–608 (New York. EE.UU. Wolters-Kluwer, Lippincott-Williams and Wilkins  
13 Publishers, 2013).
- 14 7. B. V. V. Prasad *et al.*, X-ray Crystallographic Structure of the Norwalk Virus Capsid.  
15 *Science* 286, 287–290 (1999).
- 16 8. S. C. Harrison, The familiar and the unexpected in structures of icosahedral viruses. *Curr.*  
17 *Opin. Struct. Biol.* 11, 195-199 (2001).
- 18 9. N. Miyazaki, D. W. Taylor, G. S. Hansman, K. Murata, Antigenic and cryo-electron  
19 microscopy structure analysis of a chimeric sapovirus capsid. *J. Virol.* 90, 2664–2675  
20 (2015).
- 21 10. L. J. White *et al.*, Attachment and entry of recombinant Norwalk virus capsids to cultured  
22 human and animal cell lines. *J. Virol.* 70, 6589–6597 (1996).
- 23 11. H. Q. Smith, T. J. Smith, The Dynamic Capsid Structures of the Noroviruses. *Viruses* 11,  
24 235 (2019).
- 25 12. U. Katpally, C. E. Wobus, K. Dryden, H. W. Virgin, T. J. Smith, Structure of Antibody-  
26 Neutralized Murine Norovirus and Unexpected Differences from Viruslike Particles. *J.*  
27 *Virol.* 82, 2079–2088 (2008).
- 28 13. G. S. Hansman *et al.*, Structural Basis for Broad Detection of Genogroup II Noroviruses  
29 by a Monoclonal Antibody That Binds to a Site Occluded in the Viral Particle. *J. Virol.* 86,  
30 3635–3646 (2012).

- 1 14. U. Katpally *et al.*, High-Resolution Cryo-Electron Microscopy Structures of Murine  
2 Norovirus 1 and Rabbit Hemorrhagic Disease Virus Reveal Marked Flexibility in the  
3 Receptor Binding Domains. *J. Virol.* 84, 5836–5841 (2010).
- 4 15. X. Wang *et al.*, Atomic Model of Rabbit Hemorrhagic Disease Virus by Cryo-Electron  
5 Microscopy and Crystallography. *PLOS Pathogens* 9(1), e1003132 (2013).
- 6 16. R. Chen, J. D. Neill, M. K. Estes, B. V. Prasad, X-ray structure of a native calicivirus:  
7 structural insights into antigenic diversity and host specificity. *Proc. Natl. Acad. Sci. U.S.A.*  
8 103, 8048–53 (2006).
- 9 17. R. J. Ossiboff, Y. Zhou, P. J. Lightfoot, B. V. Prasad, J. S Parker, Conformational changes  
10 in the capsid of a calicivirus upon interaction with its functional receptor. *J Virol.* 84, 5550-  
11 64 (2010).
- 12 18. M. J. Conley *et al.*, Calicivirus VP2 forms a portal-like assembly following receptor  
13 engagement. *Nature* 565, 377–381 (2019)
- 14 19. K. Katayama *et al.*, Plasmid-based human norovirus reverse genetics system produces  
15 reporter-tagged progeny virus containing infectious genomic RNA. *Proc. Natl. Acad. Sci.*  
16 *U. S. A.* 111, 4043–4052 (2014).
- 17 20. J. B. Cunha, C. E. Wobus (2016) Select membrane proteins modulate MNV-1 infection of  
18 macrophages and dendritic cells in a cell type-specific manner. *Virus Res* 222, 64–70  
19 (2016).
- 20 21. K. Haga *et al.*, Functional receptor molecules CD300lf and CD300ld within the CD300  
21 family enable murine noroviruses to infect cells. *Proc. Natl. Acad. Sci. U.S.A.* 113, E6248–  
22 E6255 (2016).
- 23 22. Y. Kitagawa *et al.*, Indirect ELISA and indirect immunofluorescent antibody assay for  
24 detecting the antibody against murine norovirus S7 in mice. *Exp. Anim.* 59, 47–55 (2010).
- 25 23. Z. Cui *et al.*, Structures of Q $\beta$  virions, virus-like particles, and the Q $\beta$ –MurA complex  
26 reveal internal coat proteins and the mechanism of host lysis. *Proc. Natl. Acad. Sci. U.S.A.*  
27 114, 11697–11702 (2017).
- 28 24. X. Jiang, M. Wang, D. Y. Graham, M. K. Estes, Expression, self-assembly, and  
29 antigenicity of the Norwalk virus capsid protein. *J. Virol.* 66, 6527–32 (1992).
- 30 25. B. V. Prasad, R. Rothnagel, X. Jiang, M. K. Estes. Three-dimen- sional structure of  
31 baculovirus-expressed Norwalk virus capsids. *J. Virol.* 68, 5117–5125 (1994).

- 1 26. S. Taube *et al.*, High-Resolution X-Ray Structure and Functional Analysis of the Murine  
2 Norovirus 1 Capsid Protein Protruding Domain. *J. Virol.* 84, 5695–5705 (2010).
- 3 27. T. Kilic, A. Koromyslova, V. Malak, G. S. Hansman, Atomic structure of the murine  
4 norovirus protruding domain and sCD300lf receptor complex. *J. Virol.* 92, 413–418 (2018).
- 5 28. R. C. Orchard *et al.*, Discovery of a proteinaceous cellular receptor for a norovirus. *Science*  
6 353, 933–936 (2016).
- 7 29. C. A. Nelson *et al.*, Structural basis for murine norovirus engagement of bile acids and  
8 the CD300lf receptor. *Proc. Natl. Acad. Sci. U. S. A.* 115, E9201–E9210 (2018).
- 9 30. K. Namba, R. Pattanayek, G. Stubbs, Visualization of protein-nucleic acid interactions in  
10 a virus. Refined structure of intact tobacco mosaic virus at 2.9 Å resolution by X-ray fiber  
11 diffraction. *J. Mol. Biol.* 208, 307–325 (1989).
- 12 31. P. Ge, Z. H. Zhou, Hydrogen-bonding networks and RNA bases revealed by cryo electron  
13 microscopy suggest a triggering mechanism for calcium switches. *Proc. Natl. Acad. Sci.*  
14 *U.S.A.* 108, 9637–9642 (2011).
- 15 32. I. -M. Yu *et al.*, Structure of the Immature Dengue Virus at Low pH Primes Proteolytic  
16 Maturation. *Science* 13, 1834–1838 (2008).
- 17 33. F. X. Heinz, K. Stiasny, The Antigenic Structure of Zika Virus and Its Relation to Other  
18 Flaviviruses: Implications for Infection and Immunoprophylaxis. *Microbiol. Mol. Biol. Rev.*  
19 81, e00055-16 (2017).
- 20 34. A. D. Stuart, T. D. Brown, Entry of feline calicivirus is dependent on clathrin-mediated  
21 endocytosis and acidification in endosomes. *J. Virol.* 80, 7500–7509 (2006).
- 22 35. M. A. Yunus, L. M. W. Chung, Y. Chaudhry, D. Bailey, I. Goodfellow, Development of  
23 an optimized RNA-based murine norovirus reverse genetics system. *J. Virol. Methods* 169,  
24 112–118 (2010).
- 25 36. M. Kitajima *et al.*, Development and application of a broadly reactive real-time reverse  
26 transcription -PCR assay for detection of murine noroviruses. *J. Virol. Methods.* 169, 269–  
27 273 (2010).
- 28 37. D. Kimanius, B. O. Forsberg, S. Scheres, E. Lindahl, Accelerated cryo-EM structure  
29 determination with parallelisation using GPUs in RELION-2. *Elife* 5, e18722 (2016).
- 30 38. A. Rohou, N. Grigorieff, CTFFIND4: Fast and accurate defocus estimation from electron  
31 micrographs. *J. Struct. Biol.* 192, 216–221 (2015).

- 1 39. S. J. Ludtke, P. R. Baldwin, W. Chiu, EMAN: semiautomated software for high-resolution  
2 single-particle reconstructions. *J. Struct. Biol.* 128, 82–97 (1999).
- 3 40. P. B. Rosenthal, R. Henderson, Optimal determination of particle orientation, absolute  
4 hand, and contrast loss in single-particle electron cryomicroscopy. *J. Mol. Biol.* 333, 721–  
5 745 (2003).
- 6 41. E. F. Pettersen *et al.*, UCSF Chimera - A visualization system for exploratory research  
7 and analysis. *J. Comput. Chem.* 25, 1605–1612 (2004).
- 8 42. S. Q. Zheng *et al.*, MotionCor2: anisotropic correction of beam-induced motion for  
9 improved cryo-electron microscopy. *Nat. Methods* 14, 331–332 (2017).
- 10 43. J. Pei, B. H. Kim, N. V. Grishin, PROMALS3D: A tool for multiple protein sequence and  
11 structure alignments. *Nucleic Acids Res.* 36, 2295–2300 (2008).
- 12 44. A. Sali, Comparative protein modeling by satisfaction of spatial restraints. *Mol. Med.*  
13 *Today* 1, 270–277 (1995).
- 14 45. P. Emsley, B. Lohkamp, W. G. Scott, K. Cowtan, Features and development of Coot. *Acta*  
15 *Crystallogr. D Biol. Crystallogr.* 66, 486–501 (2010).
- 16 46. P. D. Adams *et al.*, PHENIX: a comprehensive Python-based system for macromolecular  
17 structure solution. *Acta Crystallogr. D Biol. Crystallogr.* 66, 213–221 (2010).
- 18 47. J. A. Márquez *et al.*, The Crystal Structure of the Extracellular Domain of the Inhibitor  
19 Receptor Expressed on Myeloid Cells IREM-1. *J. Mol. Biol.* 367, 310–318 (2007).

## Figures

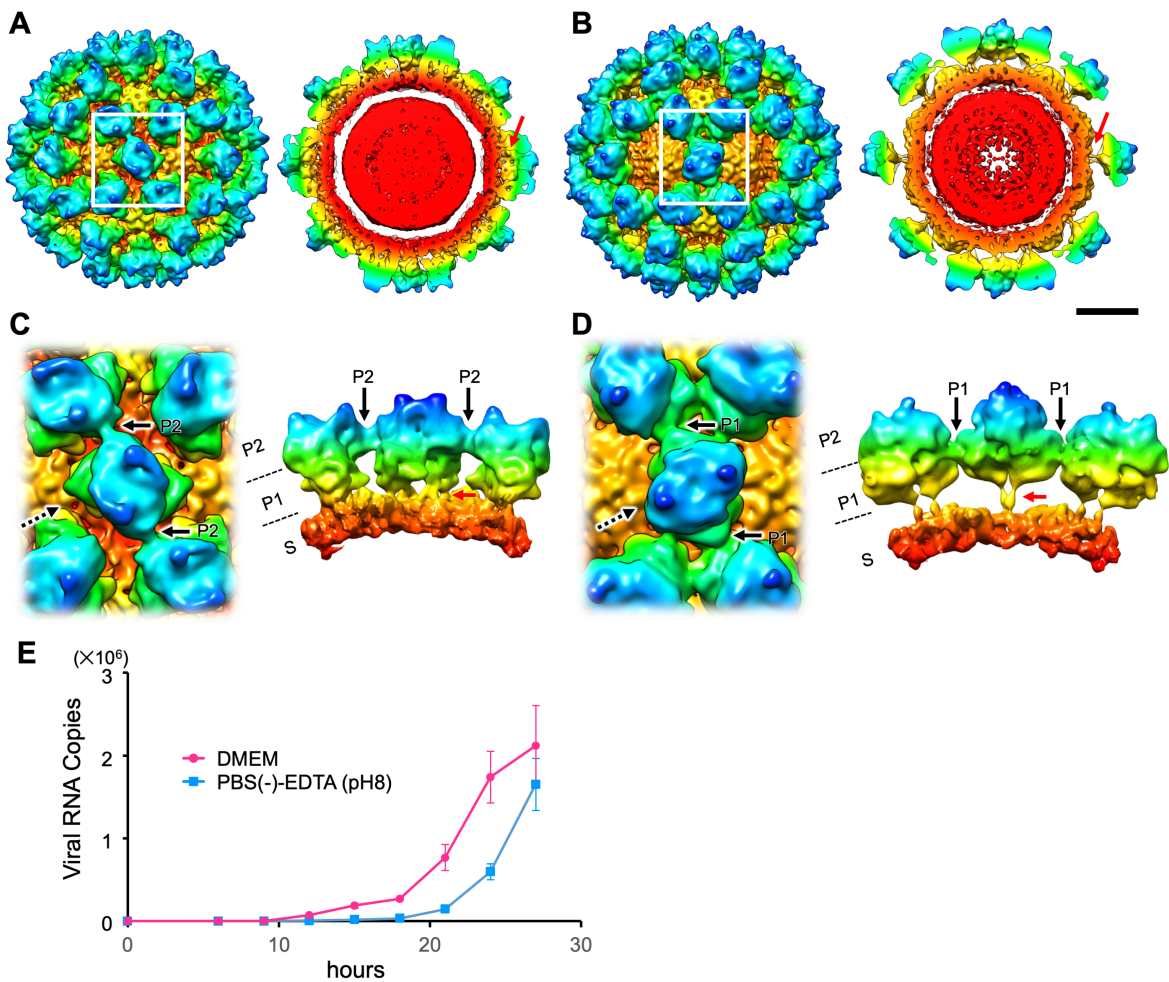

**Fig. 1.** Dynamic rotation of the P domain in MNV-1 infectious particles controls viral infection. (A and B) Cryo-EM structures of the MNV-1 infectious particles suspended in DMEM (A) and PBS(-)-EDTA (pH 8). The maps are low-pass filtered to 8 Å resolution to highlight the domain structure. The left and right panels are the isosurface representation and the center section, respectively. (C and D) Left panels are the enlarged views of the boxes in A and B. Right panels are views from the direction of the dotted arrows shown in the left panel. The P domain of MNV-1 suspended in DMEM rests on the S domain (red arrows in A and C) and interacts with the adjacent P domains at the outer P2 subdomain level (black arrows in C), called the resting P domain conformation. By contrast, the P domain of MNV-1 suspended in PBS(-)-EDTA (pH 8) rises off the S domain (red arrows in B and D) and interacts with the adjacent P domains at

the inner P1 subdomain level (black arrows in *D*), called the rising P domain conformation. In the rising P domain conformation, all P domain dimers rotate  $\sim 70^\circ$  clockwise, compared to the resting P domain conformation, and the interaction sites are changed from the P2 to the P1 level. The P domain rising off from the S domain in PBS(-)-EDTA (pH 8) reversely rests on the S domain in DMEM. Scale bar, 100 Å. (*E*) Propagation curves of MNV-1 infectious particles pretreated with DMEM and PBS(-)-EDTA (pH 8), respectively. MNV-1 infectious particles were used to infect RAW264.7 cells and the number of the duplicated viral RNA copies along the timeline were measured by qRT-PCR. Error bars represent the standard deviations. MNV-1 infectious particles pretreated with PBS(-)-EDTA (pH 8) propagated slower than those pretreated with DMEM.



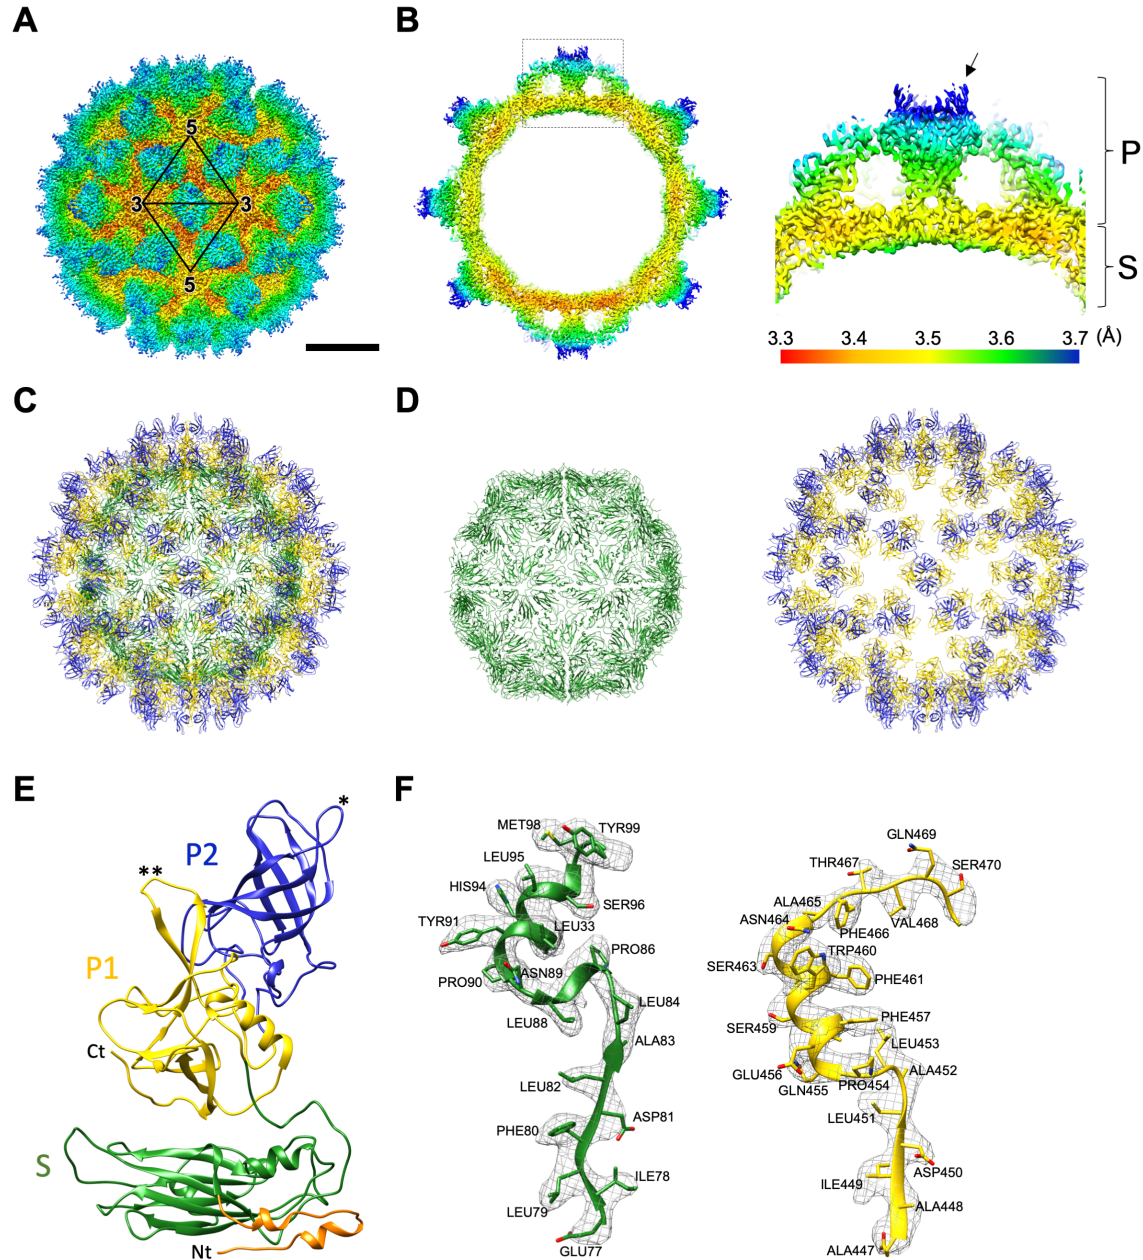

**Fig. 2.** Cryo-EM structure of MNV-S7 VLP at 3.5 Å resolution. (A) Cryo-EM map of MNV-S7 VLP in DMEM viewed down the icosahedral twofold axis. Coloring is based on radii, as follows: red, up to 161 Å; yellow 161–171 Å; green, 171–191 Å; cyan, 191–211 Å; blue, 211 Å and above. Scale bar, 100 Å. (B) Local resolution assessment on a cross section of the MNV-S7 VLP. The right panel shows a higher magnification of the square in the left image; the P and S domains are labeled. Coloring is based on the local resolution at the bottom. Arrow indicates a horn-like structure in the P domain. (C and D) The Ca backbone of the S+P (C), S (the left

panel in *D*), and P (the right panel in *D*) domains in the icosahedral MNV-S7 particle at the same orientation with *A*. The coloring follows the standard designation of P1 subdomain (yellow), P2 subdomain (blue) and S domain (green). (*E*) A ribbon model of the *C* monomer of VP1 in the MNV-S7 capsid. 502 amino acids from Val30 to Gly531 were modeled in the *C* monomer, including the P1 subdomain (yellow), P2 subdomain (blue) and S domain (green). Single and double asterisks show the loops, which function to stabilize the P domain dimer. (*F*) Representative cryo-EM electron densities of several amino acids and the fitted atomic models.

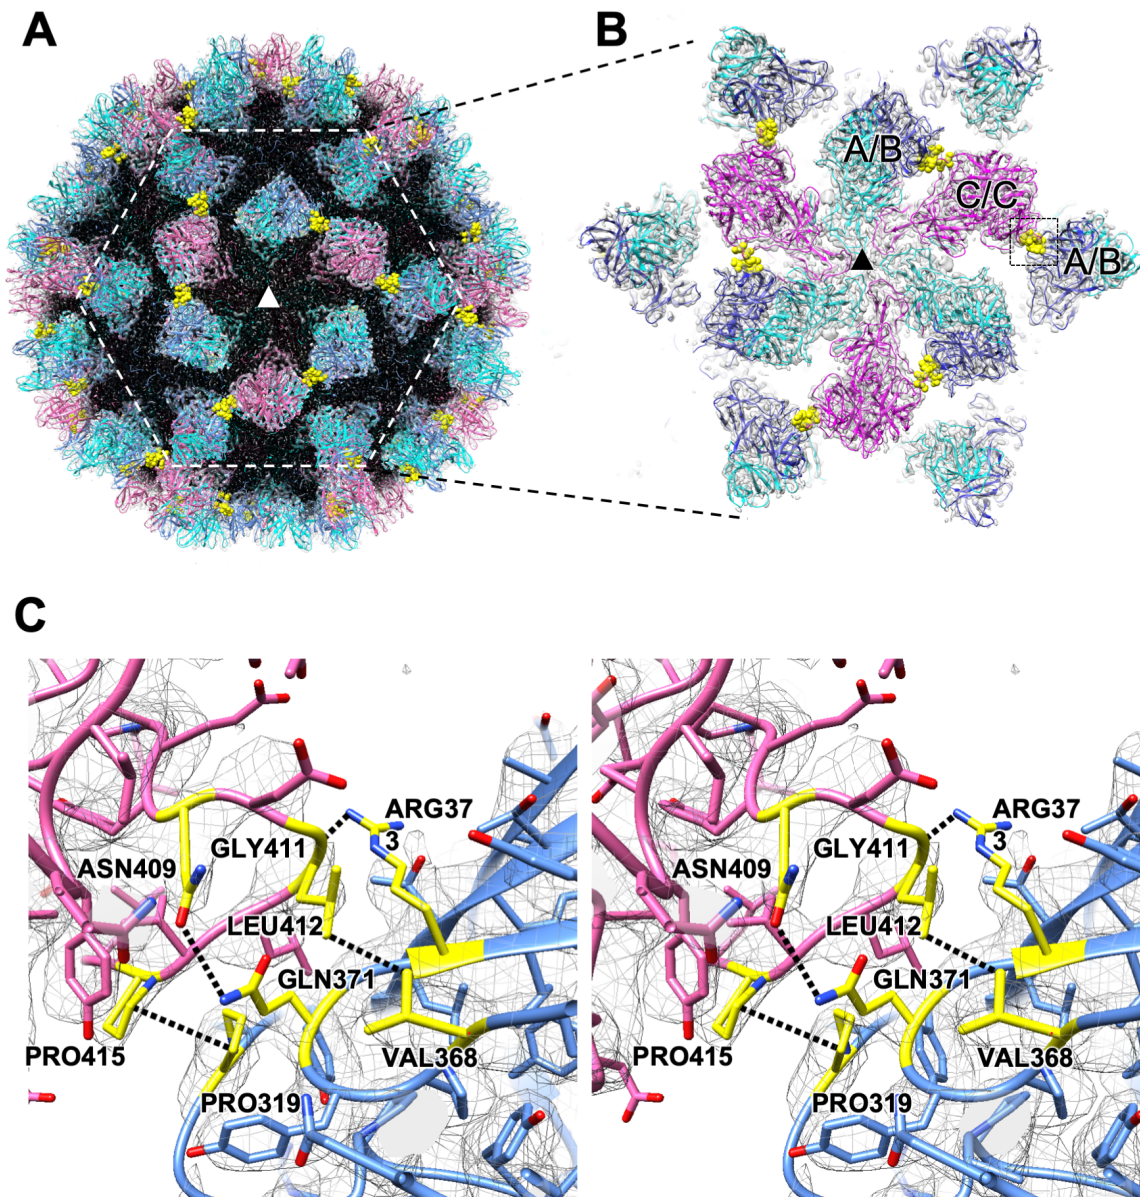

**Fig. 3.** Interactions between the resting P domain dimers. (A) A cryo-EM map of the MNV-S7 VLP highlights the interactions of the P domain dimers. The central threefold axis is labeled with a triangle. To emphasize the P-domains, the density map corresponding to the S-domain is labeled in black. (B) The enlarged view of the dotted hexagon in A. C/C-dimers (purple) on the twofold axis interact with adjacent A/B-dimers (blue) located around the fivefold axis. The residues interacting with the adjacent P domain dimers are colored by yellow. (C) A stereo view of the candidate chemical interactions between the C/C and A/B dimers indicated by the dotted square in B. Asn409, Gly411, Leu412, and Pro415 of the C/C dimer are facing with Gln371,

Arg373, Val368, and Pro319 of the A/B dimer, respectively, where hydrophobic and charged interactions are suggested to be formed.

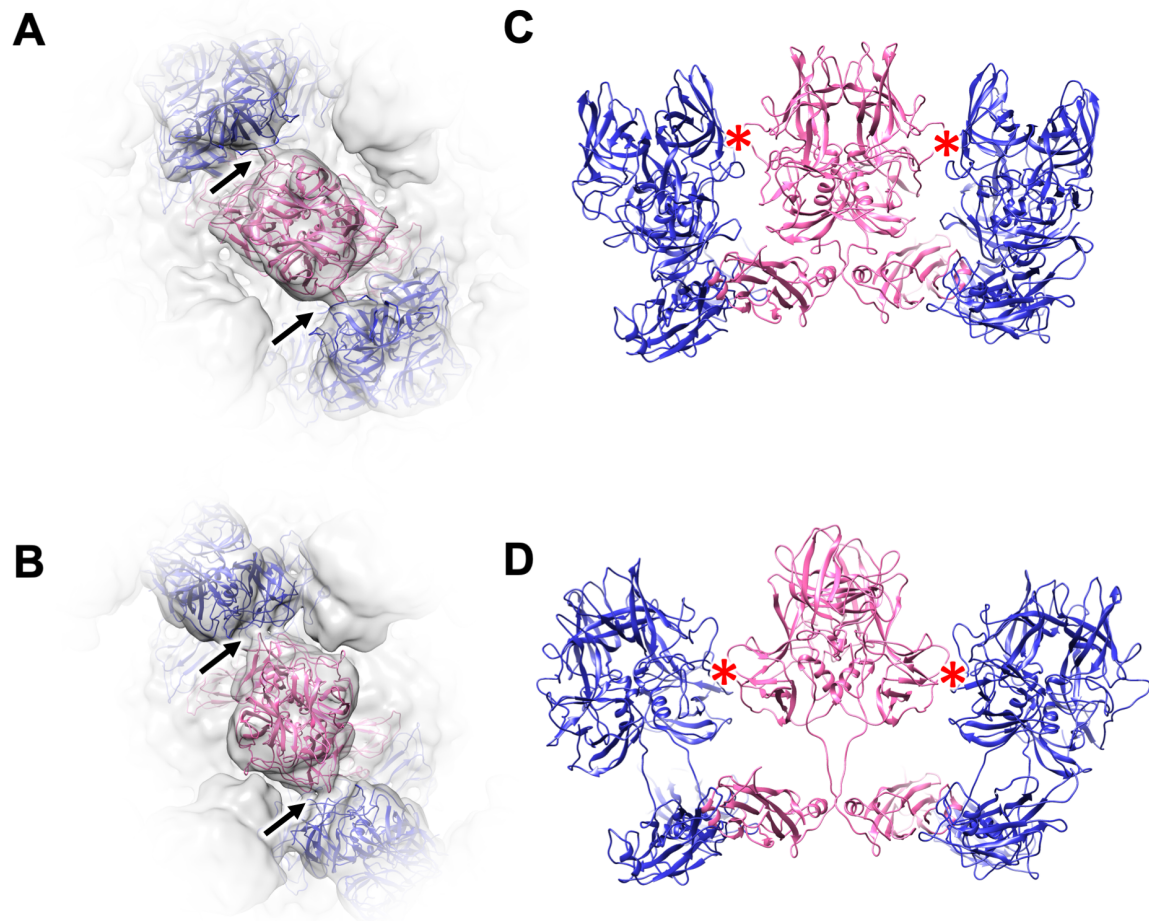

**Fig. 4.** Molecular mechanism of the reversible dynamic rotation of the P domain dimers. (*A* and *B*) Ribbon models of the C/C dimers of MNV-S7, suspended in DMEM and PBS(-)-EDTA (pH 8) are modified and fitted into the map. Arrows indicate where the C/C dimer interacts with the A/B dimers. (*C* and *D*) Side views of the ribbon models showed in *A* and *B*, respectively. The interactions linking the adjacent P domains are indicated by red asterisks. The animated dynamic rotation of the P domain dimers between two conformations are shown in Movie S1.

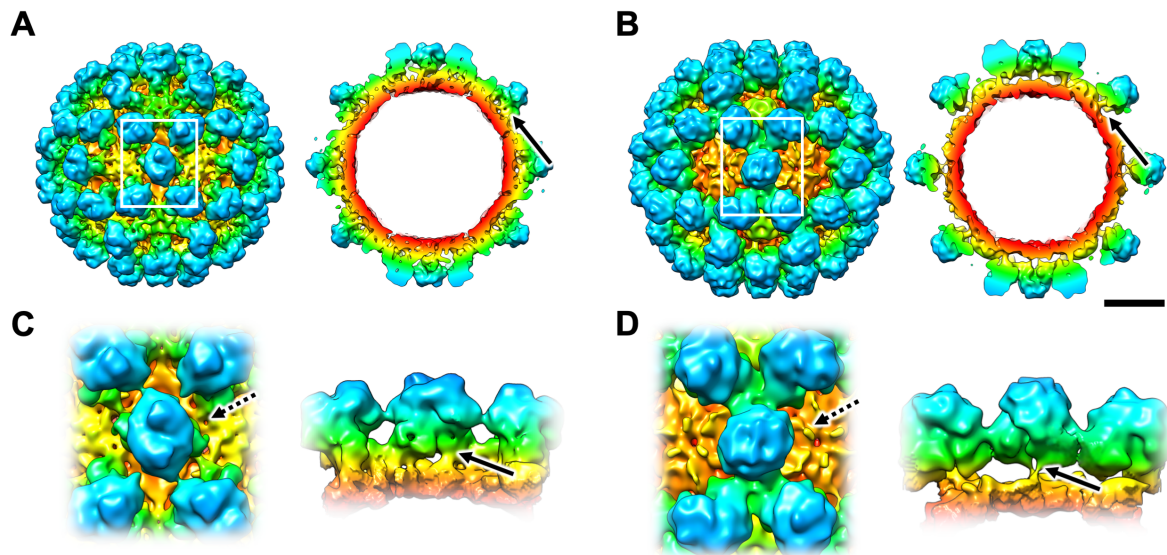

**Fig. 5** Structures of the resting and rising P domain conformations in HNV GII.3 VLPs. (*A* and *B*) Cryo-EM structures of the HNV GII.3 VLP with the resting and rising P domain conformations (arrows) displayed at 13 Å resolution, respectively. Isosurface and center section images of the whole particles are shown in left and right panels, respectively. Rotation of the P domain by  $\sim 70^\circ$  and movement of the interaction site result in a conformational change to the HNV P domains. Scale bar, 100 Å. (*C* and *D*) Left panels are enlarged views of the rectangle boxes in *A* and *B*. Right panels are views from the direction of the dotted arrows shown in the left panel. Arrows indicate the resting and rising P domain conformations, respectively.
